# Supplementary material
Source: PubMed Central journal article supplement (PMC2987363)
Supplement: ejhg201020x1.pdf [file ejhg201020x1.pdf]

**Supplementary Table 1 Results of the polymorphism on the PATRR11**

| Family | Subjects | Chromosome     | Position of proximal part of PATRR11 |                  |                  |                  |                  | Chromosome     | Position of distal part of PATRR11 |                  |                  |                  |                  |
|--------|----------|----------------|--------------------------------------|------------------|------------------|------------------|------------------|----------------|------------------------------------|------------------|------------------|------------------|------------------|
|        |          |                | -135                                 | 84               | 125              | 139              | 159              |                | -119                               | 84               | 125              | 139              | 159              |
|        |          |                | A/G                                  | AA/AAA           | (TAT)2/(TAT)3    | A/T              | A/T              |                | A/G                                | AA/AAA           | (TAT)2/(TAT)3    | A/T              | A/T              |
| 1      | Carrier  | <b>der(11)</b> | <b>G</b>                             | <b>AAA</b>       | <b>(TAT)3</b>    | <b>A</b>         | <b>A</b>         | <b>der(22)</b> | <b>G</b>                           | <b>AAA</b>       | <b>(TAT)3</b>    | <b>A</b>         | <b>A</b>         |
|        | 11       |                | G                                    | AA               | (TAT)3           | T                | T                | 11             | A                                  | AA               | (TAT)2           | A                | A                |
|        | Father   | <b>11</b>      | <b>G</b>                             | <b>AAA</b>       | <b>(TAT)3</b>    | <b>A</b>         | <b>A</b>         | <b>11</b>      | <b>G</b>                           | <b>AAA</b>       | <b>(TAT)3</b>    | <b>A</b>         | <b>A</b>         |
|        | Mother   | 11             | G                                    | AA               | (TAT)3           | T                | T                | 11             | A                                  | AA               | (TAT)2           | A                | A                |
| 2      | Carrier  | <b>der(11)</b> | <b>G</b>                             | <b>AA</b>        | <b>(TAT)3</b>    | <b>T</b>         | <b>T</b>         | <b>der(22)</b> | <b>A</b>                           | <b>AA</b>        | <b>(TAT)2</b>    | <b>A</b>         | <b>A</b>         |
|        | 11       |                | G <sup>a</sup>                       | Del <sup>a</sup> | (TAT)3           | Del <sup>a</sup> | Del <sup>a</sup> | 11             | Del <sup>a</sup>                   | Del <sup>a</sup> | (TAT)2           | Del <sup>a</sup> | Del <sup>a</sup> |
|        | Father   | <b>11</b>      | <b>G</b>                             | <b>AA</b>        | <b>(TAT)3</b>    | <b>T</b>         | <b>T</b>         | <b>11</b>      | <b>A</b>                           | <b>AA</b>        | <b>(TAT)2</b>    | <b>A</b>         | <b>A</b>         |
|        |          |                | G                                    | AA               | (TAT)2           | T                | T                |                |                                    |                  |                  |                  |                  |
|        | Mother   | 11             | A                                    | AAA              | (TAT)3           | T                | A                | 11             | G                                  | AAA              | (TAT)3           | T                | A                |
|        |          |                | Del <sup>a</sup>                     | Del <sup>a</sup> | Del <sup>a</sup> | Del <sup>a</sup> | Del <sup>a</sup> |                | Del <sup>a</sup>                   | Del <sup>a</sup> | Del <sup>a</sup> | Del <sup>a</sup> | Del <sup>a</sup> |
| 3      | Carrier  | <b>der(11)</b> | <b>A</b>                             | <b>AAA</b>       | <b>(TAT)3</b>    | <b>T</b>         | <b>A</b>         | <b>der(22)</b> | <b>G</b>                           | <b>AAA</b>       | <b>(TAT)3</b>    | <b>T</b>         | <b>A</b>         |
|        | 11       |                | G                                    | AA               | (TAT)3           | T                | T                | 11             | A                                  | AA               | (TAT)2           | A                | A                |
|        | Father   | <b>11</b>      | <b>A</b>                             | <b>AAA</b>       | <b>(TAT)3</b>    | <b>T</b>         | <b>A</b>         | <b>11</b>      | <b>G</b>                           | <b>AAA</b>       | <b>(TAT)3</b>    | <b>T</b>         | <b>A</b>         |
|        |          |                | G                                    | AA               | (TAT)3           | T                | T                |                | A                                  | AA               | (TAT)2           | A                | A                |
|        | Mother   | 11             | G                                    | AA               | (TAT)3           | T                | T                | 11             | A                                  | AA               | (TAT)2           | A                | A                |
|        |          |                |                                      |                  |                  |                  |                  |                | A                                  | AA               | (TAT)3           | A                | A                |
| 4      | Carrier  | der(11)        | G                                    | AA               | (TAT)3           | T                | T                | <b>der(22)</b> | <b>A</b>                           | <b>AA</b>        | <b>(TAT)3</b>    | <b>A</b>         | <b>A</b>         |
|        | 11       |                | G                                    | AA               | (TAT)3           | T                | T                | 11             | A                                  | AA               | (TAT)2           | A                | A                |
|        | Father   | 11             | G                                    | AA               | (TAT)3           | T                | T                | <b>11</b>      | <b>A</b>                           | <b>AA</b>        | <b>(TAT)3</b>    | <b>A</b>         | <b>A</b>         |
|        |          |                |                                      |                  |                  |                  |                  | A              | AA                                 | (TAT)2           | A                | A                |                  |
|        | Mother   | 11             | G                                    | AA               | (TAT)3           | T                | T                | 11             | A                                  | AA               | (TAT)2           | A                | A                |
|        |          |                |                                      |                  |                  |                  |                  |                | A                                  | AA               | (TAT)2           | A                | A                |
| 5      | Carrier  | <b>der(11)</b> | <b>G</b>                             | <b>AA</b>        | <b>(TAT)2</b>    | <b>A</b>         | <b>A</b>         | der(22)        | A                                  | AA               | (TAT)2           | A                | A                |
|        | 11       |                | G                                    | AAA              | (TAT)3           | A                | A                | 11             | G                                  | AAA              | (TAT)3           | A                | A                |
|        | Mother   | 11             | G                                    | AA               | (TAT)3           | T                | T                | 11             | A                                  | AA               | (TAT)2           | A                | A                |
|        |          |                | G                                    | AAA              | (TAT)3           | A                | A                |                | G                                  | AAA              | (TAT)3           | A                | A                |
| 6      | Carrier  | der(11)        | G                                    | AA               | (TAT)3           | T                | T                | der(22)        | A                                  | AA               | (TAT)3           | A                | A                |
|        | 11       |                | G                                    | AA               | (TAT)3           | T                | T                | 11             | A                                  | AA               | (TAT)2           | A                | A                |
|        | Father   | 11             | G                                    | AA               | (TAT)3           | T                | T                | 11             | A                                  | AA               | (TAT)3           | A                | A                |
|        |          |                |                                      |                  |                  |                  |                  | A              | AA                                 | (TAT)2           | A                | A                |                  |
|        | Mother   | 11             | G                                    | AA               | (TAT)3           | T                | T                | 11             | A                                  | AA               | (TAT)2           | A                | A                |
|        |          |                |                                      |                  |                  |                  |                  |                | A                                  | AA               | (TAT)3           | A                | A                |
| 7      | Carrier  | <b>der(11)</b> | <b>G</b>                             | <b>AA</b>        | <b>(TAT)3</b>    | <b>T</b>         | <b>T</b>         | <b>der(22)</b> | <b>A</b>                           | <b>AA</b>        | <b>(TAT)2</b>    | <b>A</b>         | <b>A</b>         |
|        | 11       |                | G                                    | AAA              | (TAT)3           | A                | A                | 11             | G                                  | AAA              | (TAT)3           | A                | A                |
|        | Father   | <b>11</b>      | <b>G</b>                             | <b>AA</b>        | <b>(TAT)3</b>    | <b>T</b>         | <b>T</b>         | <b>11</b>      | <b>A</b>                           | <b>AA</b>        | <b>(TAT)2</b>    | <b>A</b>         | <b>A</b>         |
|        |          |                |                                      |                  |                  |                  |                  | A              | AA                                 | (TAT)3           | A                | A                |                  |
|        | Mother   | 11             | G                                    | AAA              | (TAT)3           | A                | A                | 11             | G                                  | AAA              | (TAT)3           | A                | A                |
|        |          |                | G                                    | AA               | Del <sup>b</sup> | Del <sup>b</sup> | Del <sup>b</sup> |                | A                                  | AA               | Del <sup>b</sup> | Del <sup>b</sup> | Del <sup>b</sup> |
| 8      | Carrier  | der(11)        | G                                    | AA               | (TAT)3           | T                | T                | der(22)        | A                                  | AA               | (TAT)2           | A                | A                |
|        | 11       |                | G                                    | AA               | (TAT)3           | T                | T                | 11             | A                                  | AA               | (TAT)2           | A                | A                |
|        | Father   | 11             | G                                    | AA               | (TAT)3           | T                | T                | 11             | A                                  | AA               | (TAT)2           | A                | A                |
|        |          |                |                                      |                  |                  |                  |                  | G              | AAA                                | (TAT)3           | A                | A                |                  |
|        | Mother   | 11             | G                                    | AA               | (TAT)3           | T                | T                | 11             | A                                  | AA               | (TAT)2           | A                | A                |
|        |          |                |                                      |                  |                  |                  |                  |                |                                    |                  |                  |                  |                  |

Sequences were determined by direct sequencing or cloning of PCR products. Position number of the proximal side corresponds to nucleotides from the proximal end of the PATRR11 to the distal end. Minus indicates nucleotides out side of the PATRR. Similarly, distal side is from the distal end of the PATRR11 to the proximal side.

<sup>a</sup>This allele was a newly certified deletion of the PATRR11.

<sup>b</sup>This allele was a short type of the PATRR11.
